# Supplementary material
Source: MDPI journal article supplement (https://www.mdpi.com/2073-4344/10/8/874)
Supplement: s1 [file s1]

**Supplementary Information to**  
**„A combined bio-chemical synthesis route for 1-octene sheds light on**  
**rhamnolipid structure“**  
**by Tiso, Sauer *et al.***

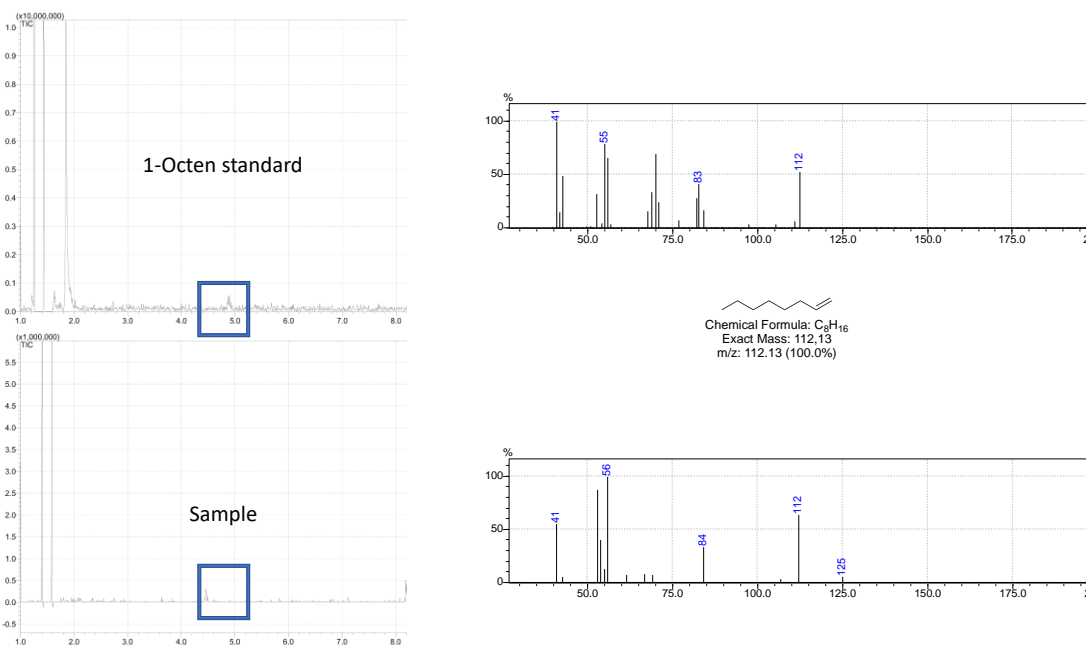

**Figure S1:** GC-MS analysis of the ethenolysis reaction. Above is an authentic sample of 1-octene as reference. Below is the GC-MS analysis of the reaction mixture. The sample was measured splitless.
